# Supplementary material
Source: Springer Nature journal article supplement (https://www.springermedizin.de/resource/supplementary/12936_2011_1889_MOESM8_ESM.pdf/9542006)

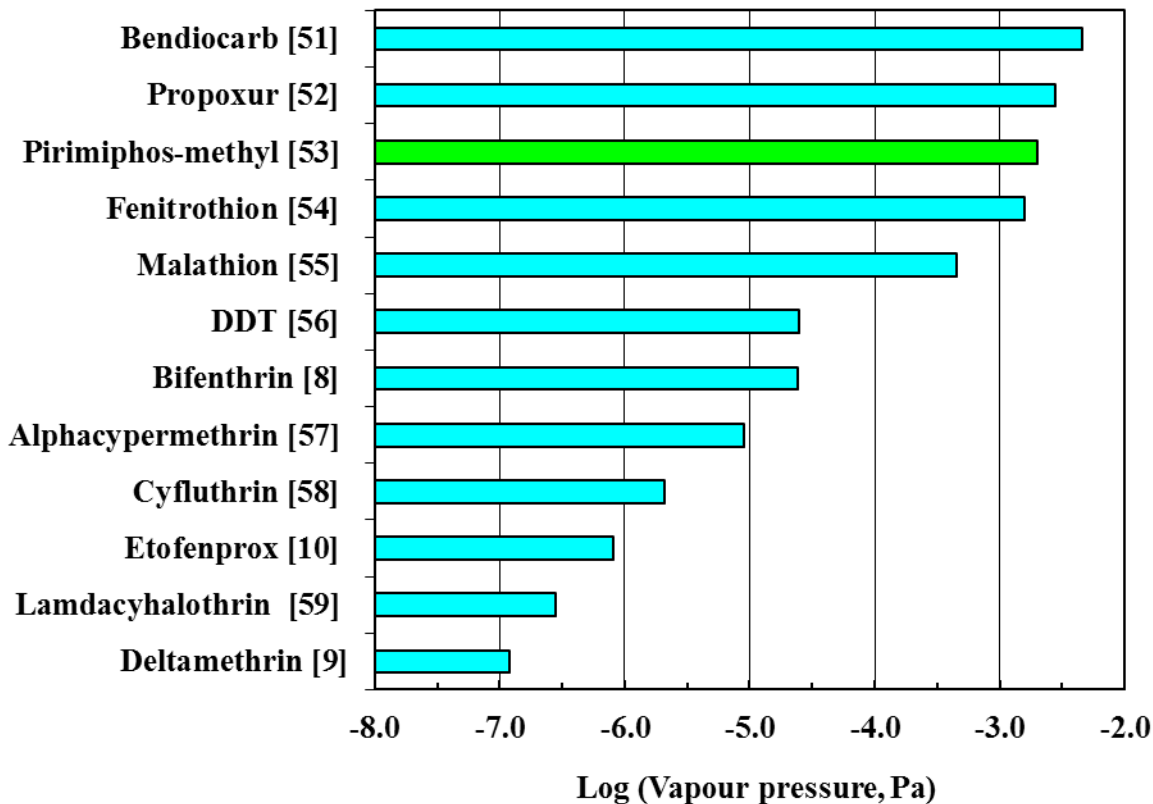

Supplement: MOESM8 [file 9542006]
